# Supplementary material
Source: MDPI journal article supplement (https://www.mdpi.com/1996-1073/16/8/3443)
Supplement: s1 [file s1]

**Electronic Supplementary Information to**

**Improving the Efficiency of Organic Solar Cells via the  
Molecular Engineering of Simple Fused Non-Fullerene  
Acceptors**

**Elizaveta D. Papkovskaya <sup>1</sup>, Ji Wan <sup>2</sup>, Dmitry O. Balakirev <sup>1</sup>, Ivan V. Dyadishchev <sup>1</sup>, Artem V. Bakirov <sup>1,3</sup>,  
Yuriy N. Luponosov <sup>1</sup>, Jie Min <sup>2,\*</sup> and Sergey A. Ponomarenko <sup>1,\*</sup>**

<sup>1</sup> Enikolopov Institute of Synthetic Polymeric Materials of the Russian Academy of Sciences,  
Profsoyuznaya St. 70, Moscow 117393, Russia

<sup>2</sup> The Institute for Advanced Studies, Wuhan University, Wuhan 430072, China

<sup>3</sup> Scientific and Research Centre Kurchatov Institute, 1 Kurchatov Square, Moscow 123182, Russia

\* Correspondence: min.jie@whu.edu.cn (J.M.); ponomarenko@ispm.ru (S.A.P.)

## 1. $^1\text{H}$ and $^{13}\text{C}$ NMR Spectra

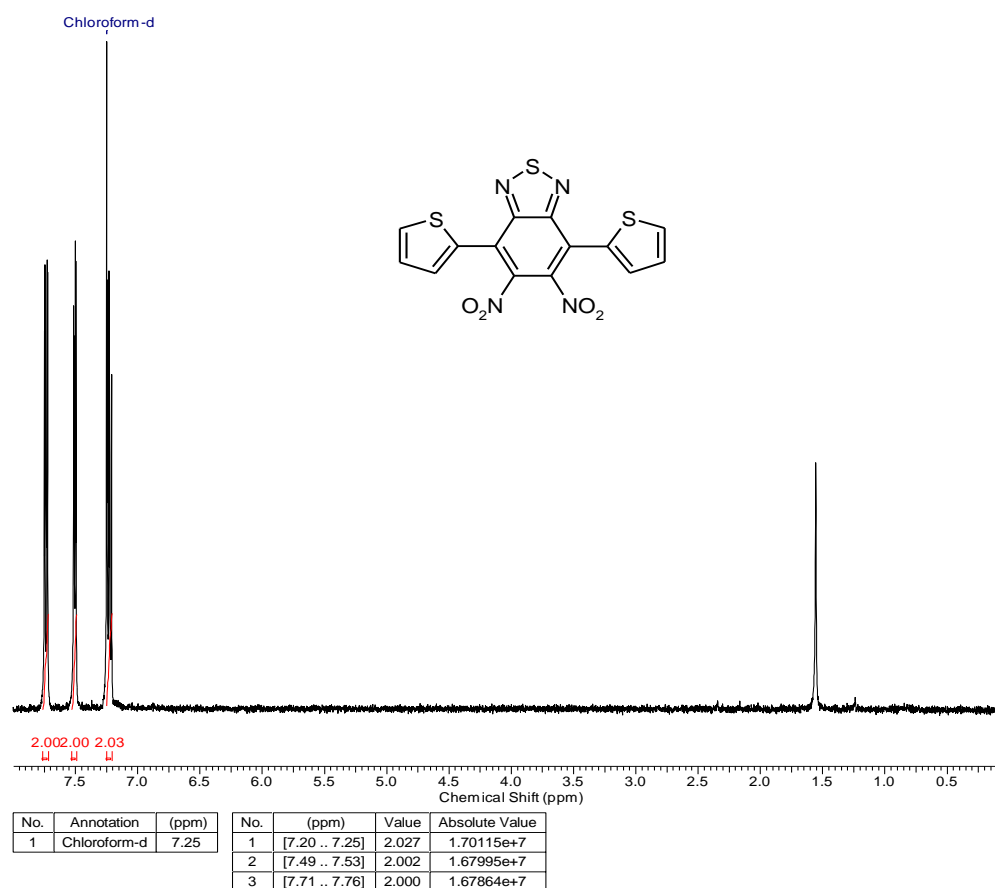

**Figure S1.**  $^1\text{H}$  NMR spectrum of compound **2** in  $\text{CDCl}_3$ .

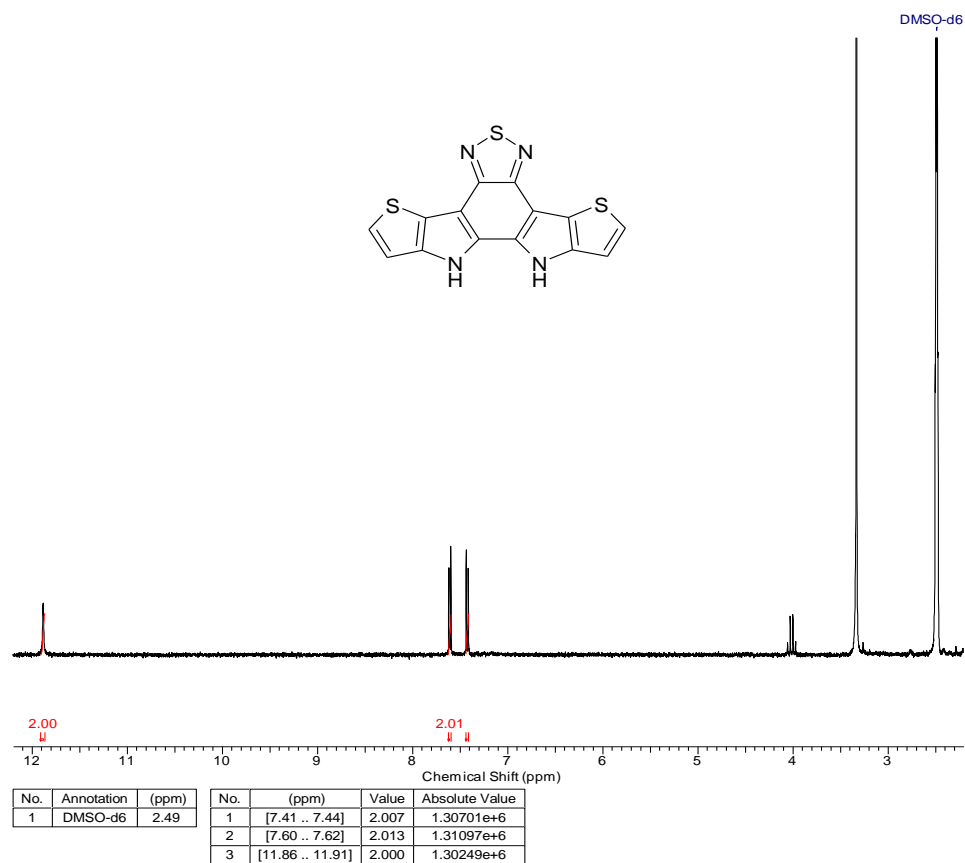

**Figure S2.**  $^{13}\text{C}$  NMR spectrum of compound **2** in  $\text{CDCl}_3$ .



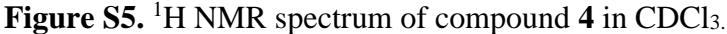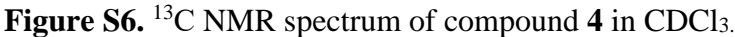

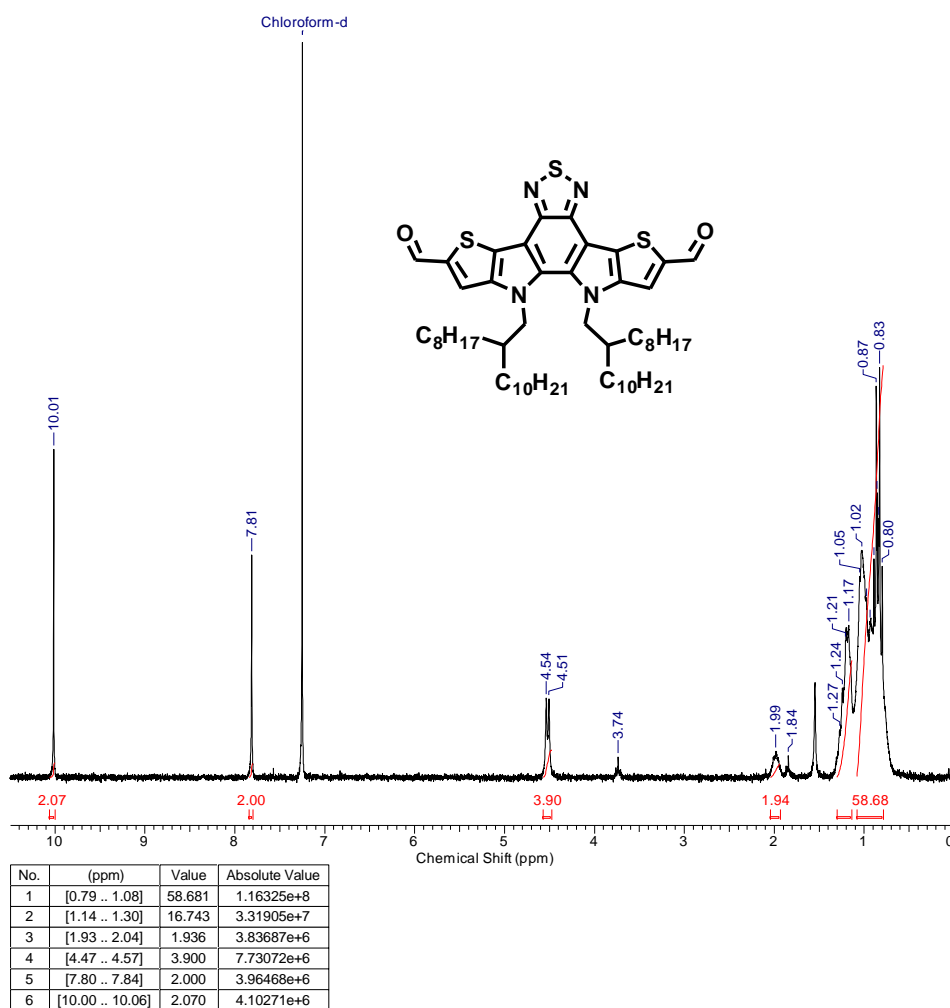

**Figure S7.**  $^1\text{H}$  NMR spectrum of compound **5** in  $\text{CDCl}_3$ .

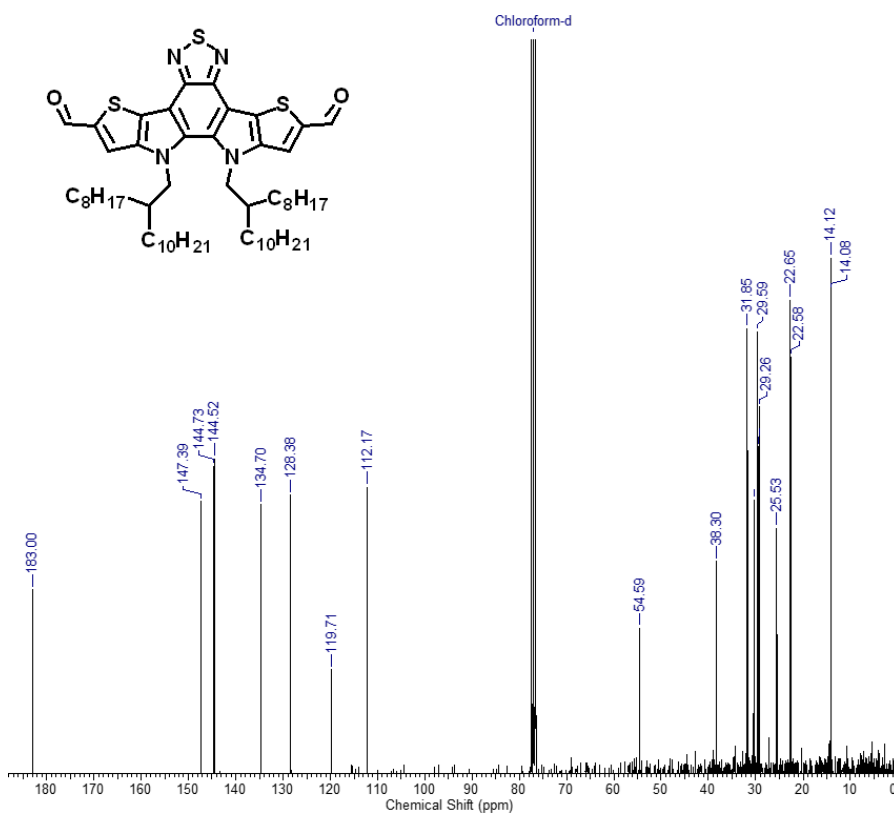

**Figure S8.**  $^{13}\text{C}$  NMR spectrum of compound **5** in  $\text{CDCl}_3$ .

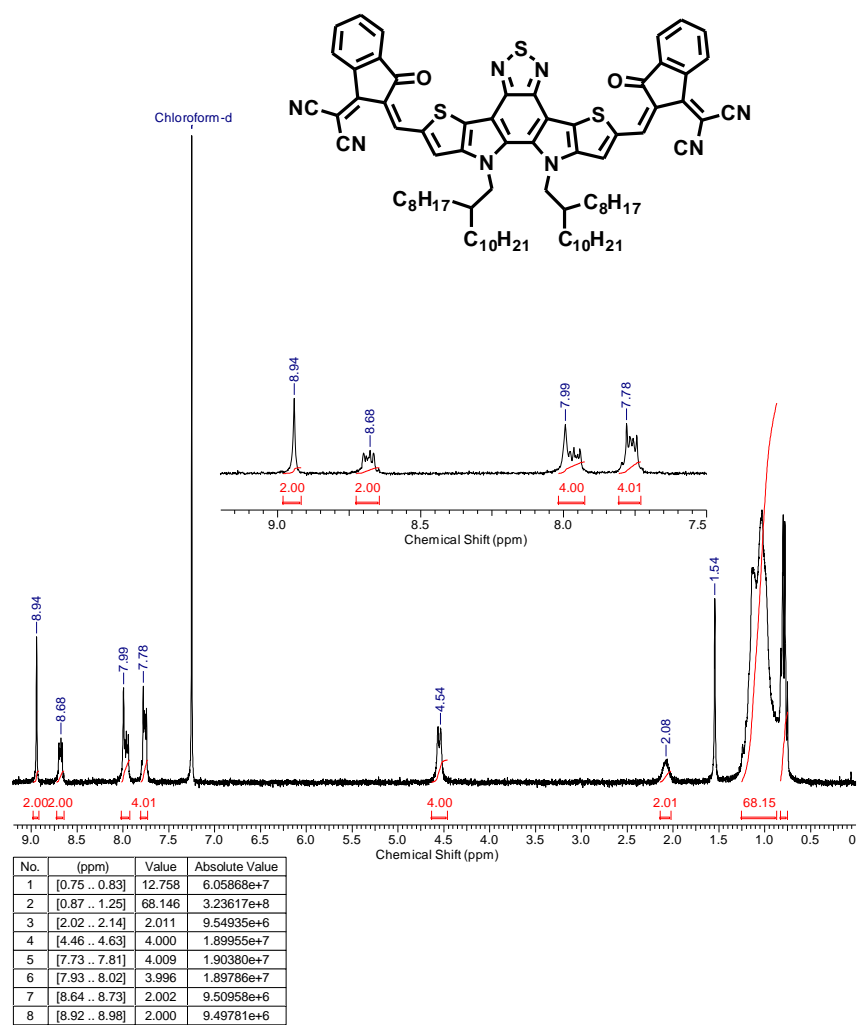

**Figure S9.**  $^1\text{H}$  NMR spectrum of BTPT-OD in CDCl<sub>3</sub>.

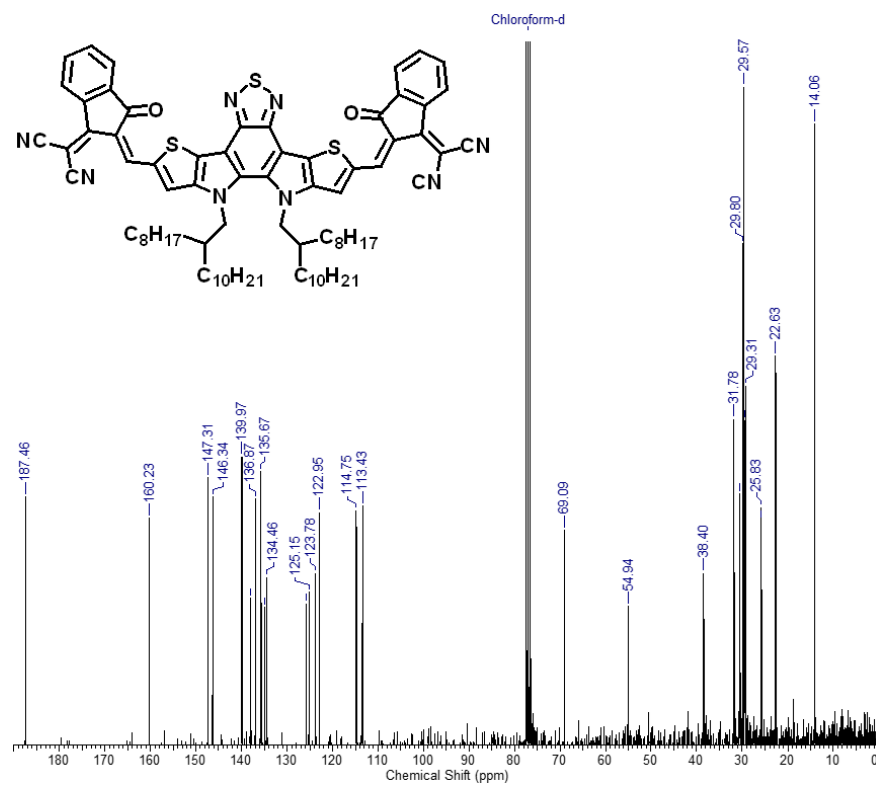

**Figure S10.**  $^{13}\text{C}$  NMR spectrum of compound BTPT-OD in CDCl<sub>3</sub>.

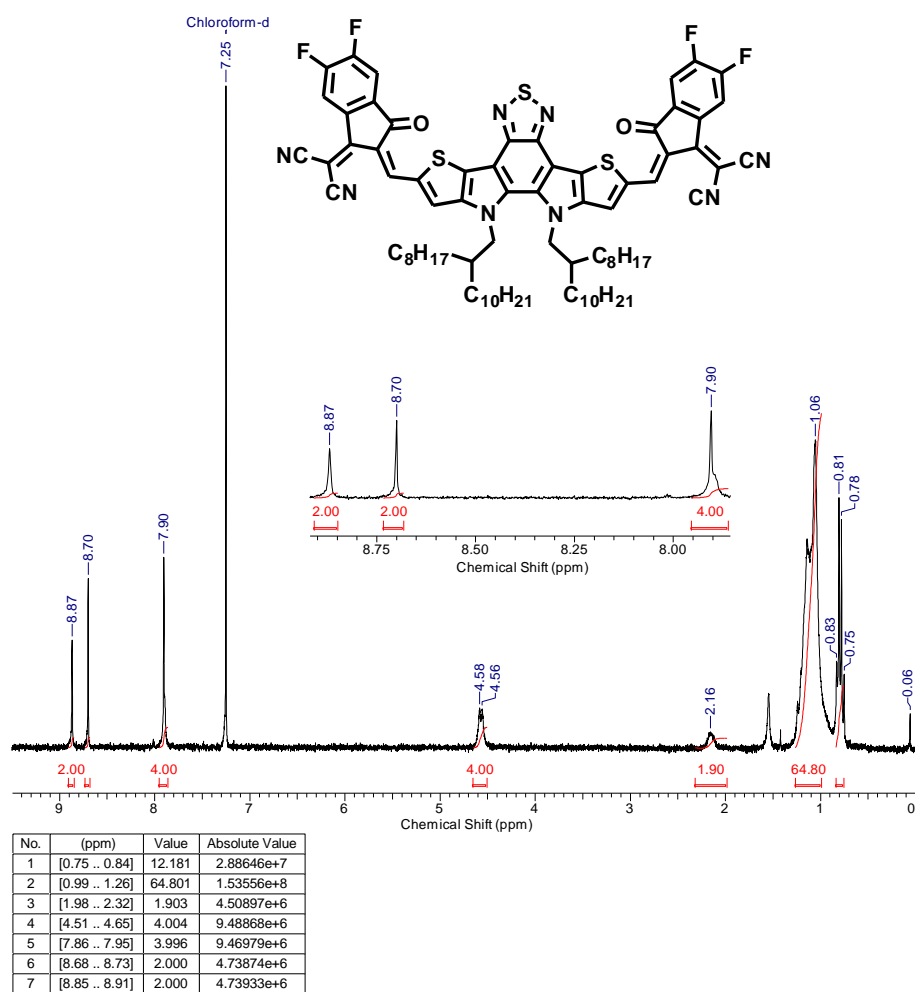

**Figure S11.**  $^1\text{H}$  NMR spectrum of **BTPT-4F-OD** in  $\text{CDCl}_3$ .

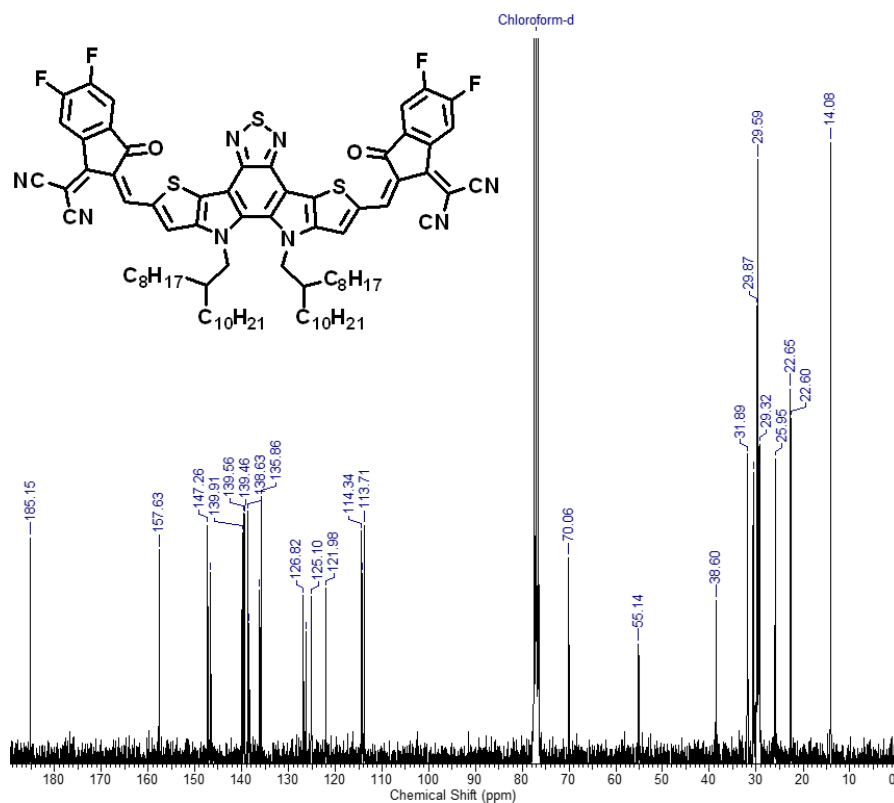

**Figure S12.**  $^{13}\text{C}$  NMR spectrum of compound **BTPT-4F-OD** in  $\text{CDCl}_3$ .

## 2. Photovoltaic Properties

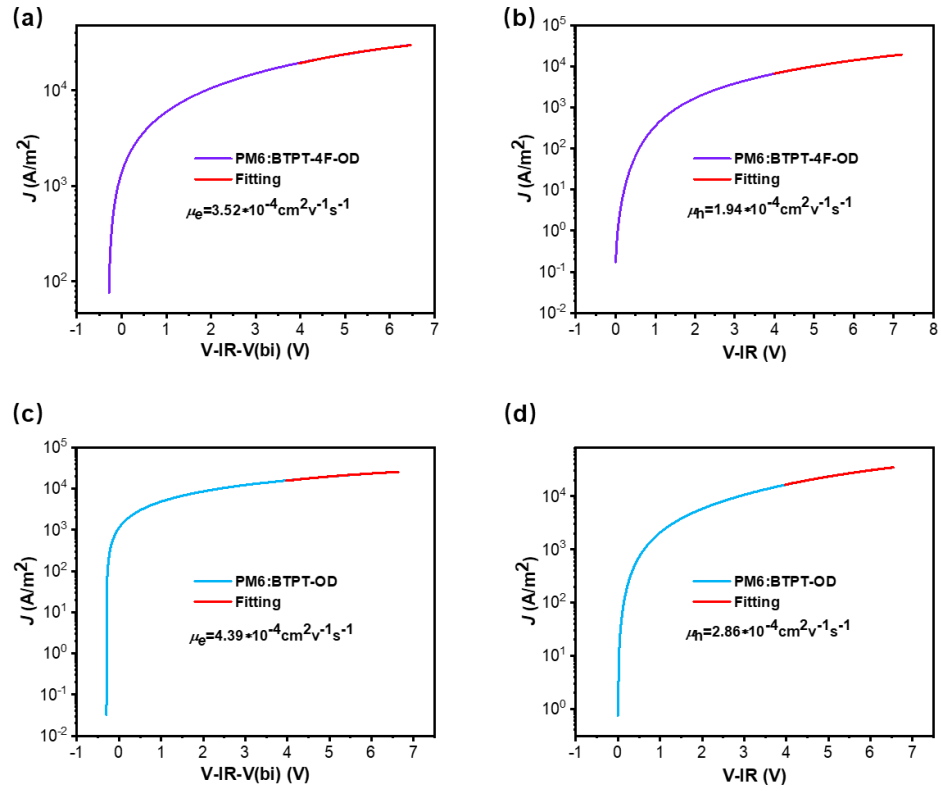

**Figure S13.** The electron mobilities and hole mobilities of (a,b) PM6: BTPT-4F-OD and (c,d) PM6: BTPT-OD devices measured using the SCLC approach.
